# Supplementary material for: Immunoinformatics Studies and Design of a Potential Multi-Epitope Peptide Vaccine to Combat the Fatal Visceral Leishmaniasis
Source: MDPI journal article supplement (doi:10.3390/vaccines10101598), 2022-09-22
Supplement: s1 [file s1]

**Table S1.** Physiochemical properties of the vaccine protein sequence.

|                                                                |                                                                                                                      |        |            |        |
|----------------------------------------------------------------|----------------------------------------------------------------------------------------------------------------------|--------|------------|--------|
| <b>Number of amino acids</b>                                   | 248                                                                                                                  |        |            |        |
| <b>Molecular weight</b>                                        | 26962.50                                                                                                             |        |            |        |
| <b>Theoretical pI</b>                                          | 5.94                                                                                                                 |        |            |        |
| <b>Amino acid composition</b>                                  | Ala (A) 61                                                                                                           | 24.60% | Ser (S) 9  | 3.60%  |
|                                                                | Arg (R) 2                                                                                                            | 0.80%  | Thr (T) 21 | 8.50%  |
|                                                                | Asn (N) 4                                                                                                            | 1.60%  | Trp (W) 0  | 0.00%  |
|                                                                | Asp (D) 9                                                                                                            | 3.60%  | Tyr (Y) 31 | 12.50% |
|                                                                | Cys (C) 0                                                                                                            | 0.00%  | Val (V) 21 | 8.50%  |
|                                                                | Gln (Q) 9                                                                                                            | 3.60%  | Pyl (O) 0  | 0.00%  |
|                                                                | Glu (E) 8                                                                                                            | 3.20%  | Sec (U) 0  | 0.00%  |
|                                                                | Gly (G)10                                                                                                            | 4.00%  | (B) 0      | 0.00%  |
|                                                                | His (H) 7                                                                                                            | 2.80%  | (Z) 0      | 0.00%  |
|                                                                | Ile (I) 6                                                                                                            | 2.40%  | (X) 0      | 0.00%  |
|                                                                | Leu (L) 13                                                                                                           | 5.20%  |            |        |
|                                                                | Lys (K) 11                                                                                                           | 4.40%  |            |        |
|                                                                | Met (M) 6                                                                                                            | 2.40%  |            |        |
|                                                                | Phe (F) 15                                                                                                           | 6.00%  |            |        |
|                                                                | Pro (P) 5                                                                                                            | 2.00%  |            |        |
| <b>Total number of negatively charged residues (Asp + Glu)</b> | 17                                                                                                                   |        |            |        |
| <b>Total number of positively charged residues (Arg + Lys)</b> | 13                                                                                                                   |        |            |        |
| <b>Atomic composition</b>                                      | Carbon C                                                                                                             | 1259   |            |        |
|                                                                | Hydrogen H                                                                                                           | 1832   |            |        |
|                                                                | Nitrogen N                                                                                                           | 292    |            |        |
|                                                                | Oxygen O                                                                                                             | 357    |            |        |
|                                                                | Sulfur S                                                                                                             | 6      |            |        |
| <b>Formula</b>                                                 | $C_{1259}H_{1832}N_{292}O_{357}S_6$                                                                                  |        |            |        |
| <b>Total number of atoms</b>                                   | 3746                                                                                                                 |        |            |        |
| <b>Extinction Coefficients (M-1 cm-1, at 280 nm)</b>           | 46190                                                                                                                |        |            |        |
| <b>Abs 0.1% (=1 g/l)</b>                                       | 1.71                                                                                                                 |        |            |        |
| <b>Estimated half-life</b>                                     | 4.4 hours (mammalian reticulocytes, in vitro)<br>>20 hours (yeast, in vivo)<br>>10 hours (Escherichia coli, in vivo) |        |            |        |
| <b>Instability index</b>                                       | 27.30 (This classifies the protein as stable)                                                                        |        |            |        |
| <b>Aliphatic index</b>                                         | 79.03                                                                                                                |        |            |        |
| <b>Grand average of hydropathicity (GRAVY)</b>                 | 0.30                                                                                                                 |        |            |        |
